# Supplementary material
Source: PubMed Central journal article supplement (PMC10115778)
Supplement: 41467_2023_37972_MOESM1_ESM.pdf [file 41467_2023_37972_MOESM1_ESM.pdf]

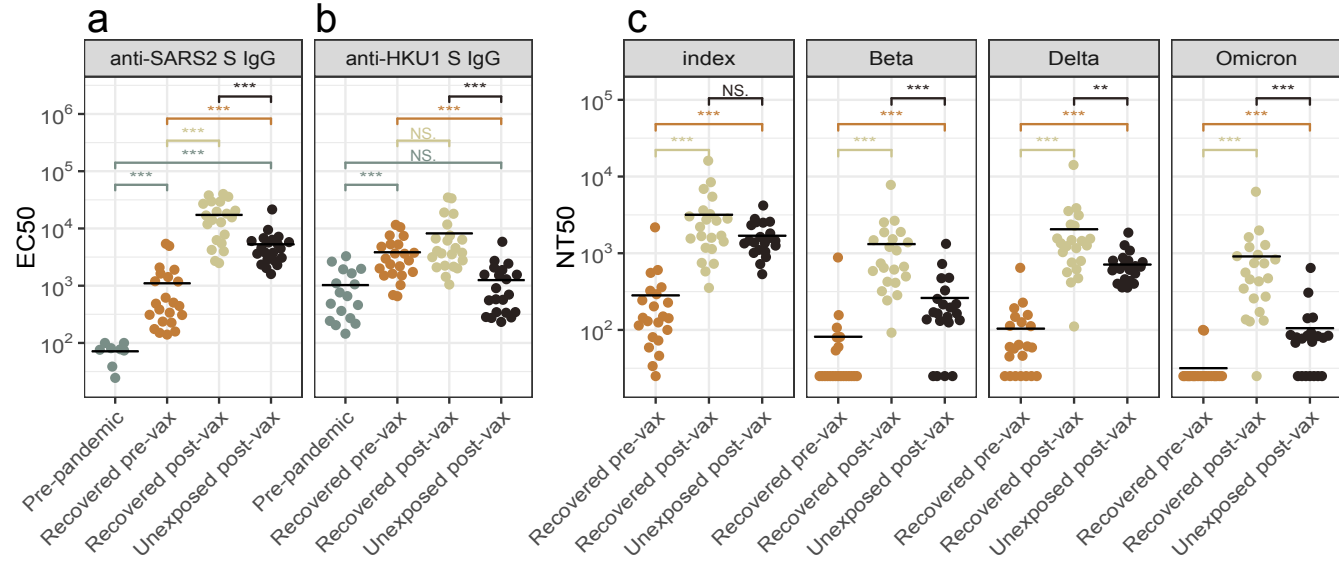

**Supplementary Figure 1.** Serum IgG titers against SARS-CoV-2/HCoV-HKU1 S glycoproteins and neutralizing antibody titers of donors infected and/or vaccinated against SARS-CoV-2.

(a) Serum IgG titers against the SARS-CoV-2 glycoproteins. (b) Serum IgG titers against HCoV-HKU1 S glycoproteins. (c) Neutralizing antibody titers against index SARS-CoV-2 and variants. Samples were taken from a cohort of individuals a median of 8 days (range: 7-14) days after vaccination by mRNA-1273 ( $n = 22$ ) or BNT162b2 ( $n = 21$ ), 22 of whom were previously infected with SARS-CoV-2 (Recovered) and given one dose and 21 who were not previously infected (Unexposed) and given two doses. The previously infected individuals were vaccinated a median of 179 days after disease onset (range: 40-213 days). For these individuals, we also included serum samples collected a median of 42 (range 0-176) days before the mRNA vaccination. We used two-sided Mann-Whitney U-tests to compare titers.

\* $P < 0.05$ , \*\* $P < 0.01$ , and \*\*\* $P < 0.001$ ; the exact p-values are provided in the Source Data file.

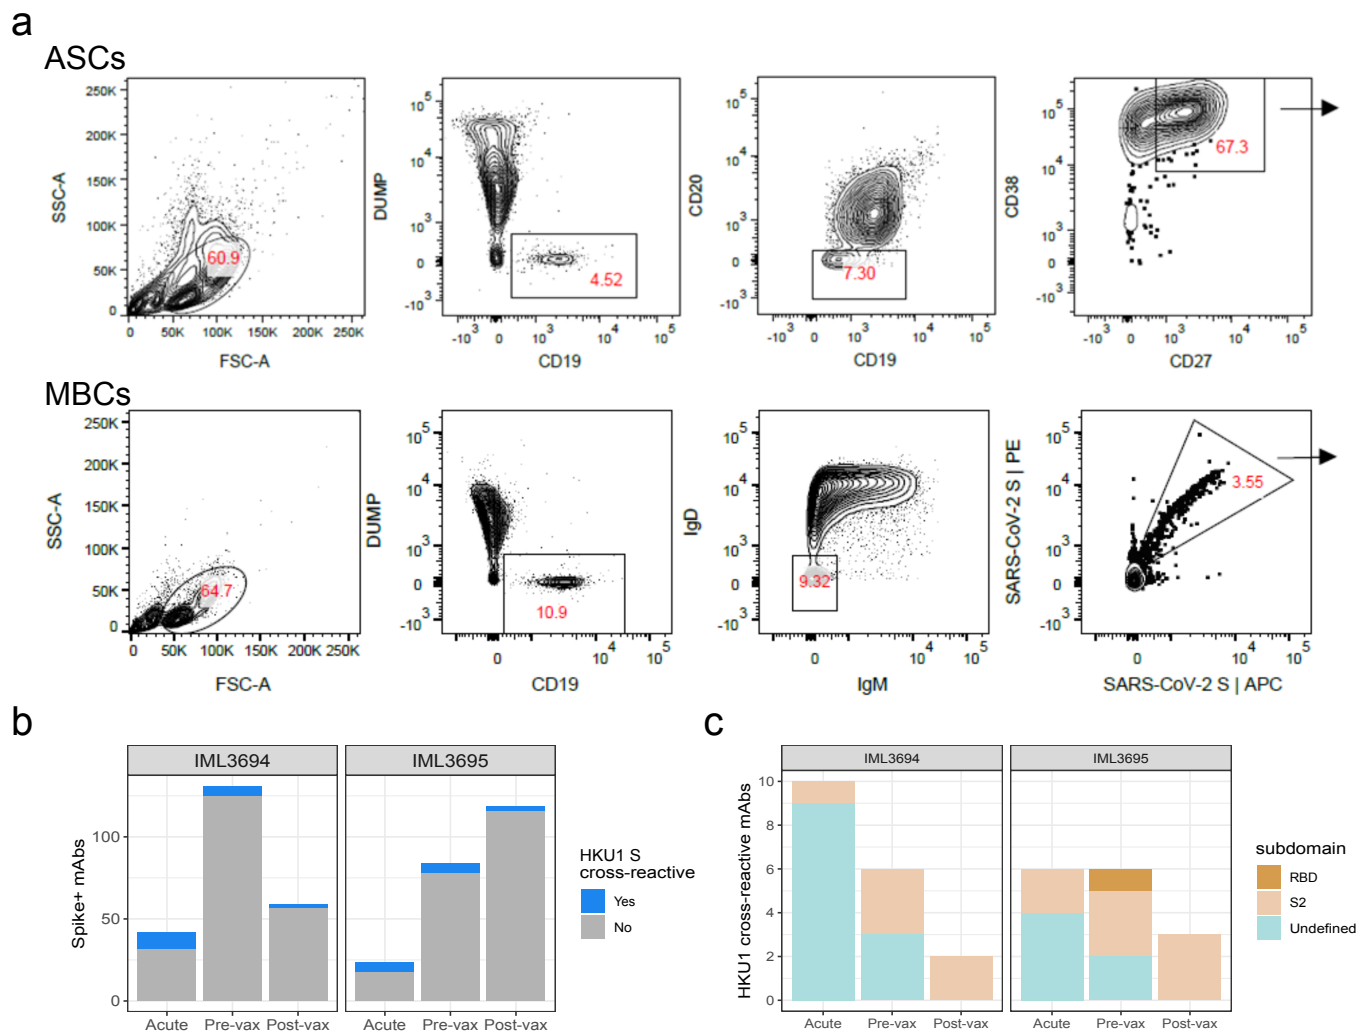

**Supplementary Figure 2.** FACS strategy and summaries of HKU1 S cross-reactive mAb data.

(a) Flow cytometry plots showing the staining and gating strategy for sorting ASCs and spike-specific MBCs. (b) The number of HCoV-HKU1 and SARS-CoV-2 S cross-reactive mAbs versus SARS-CoV-2 S-specific mAbs isolated at the different time points. (c) Sub-specificities of the HKU1 S cross-reactive mAbs isolated at the different time points.

a

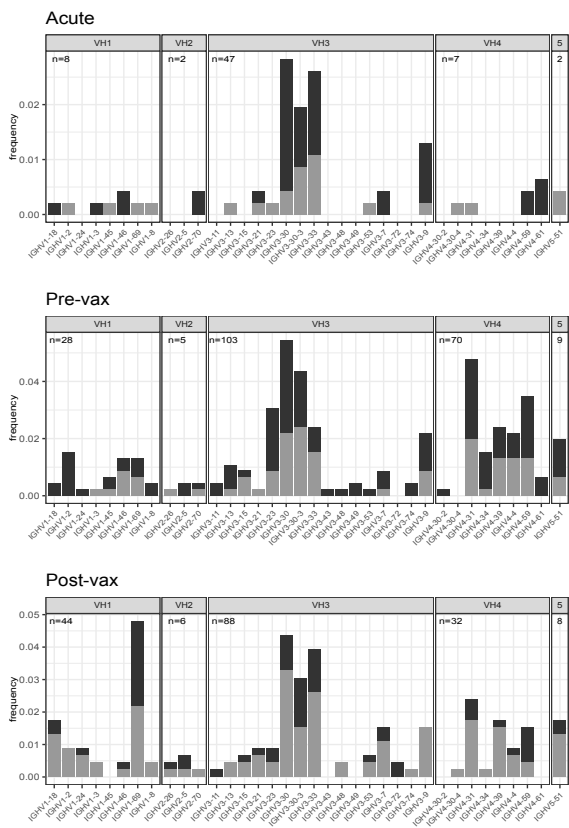

b

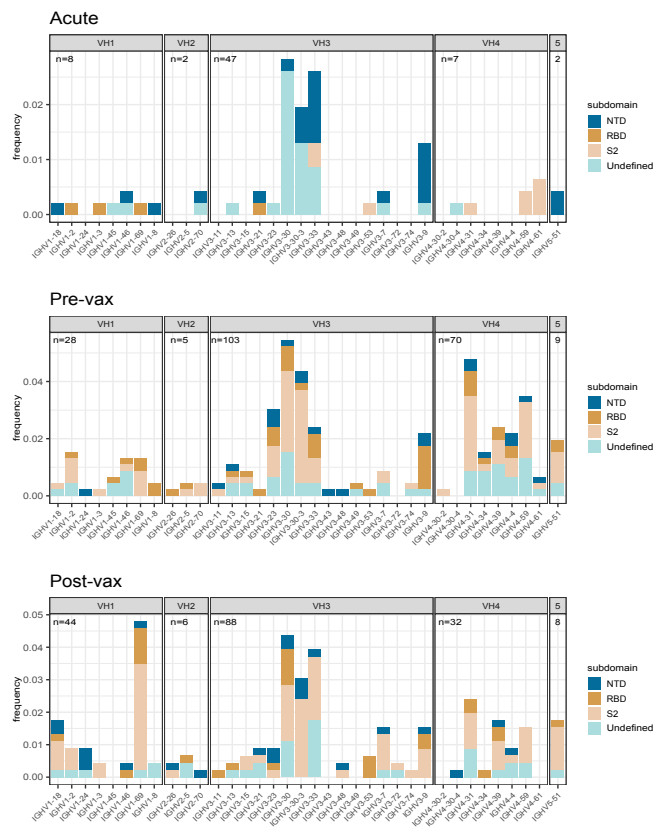

c

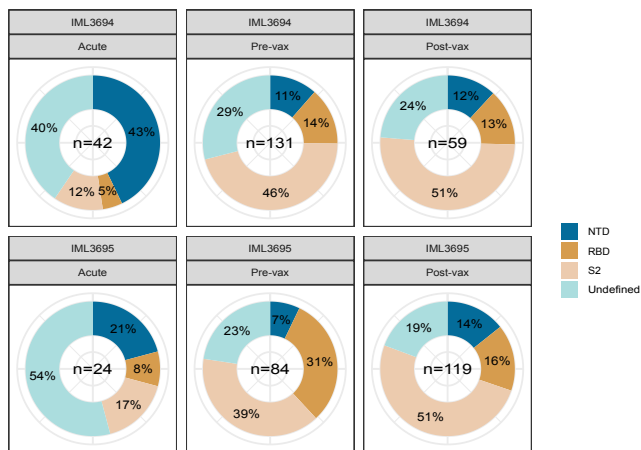

**Supplementary Figure 3.** Longitudinally separated properties of spike-binding mAbs.

(a) mAb IGHV allele frequencies colored by donor, shown separately for the three sets of mAbs isolated at the different time points. (b) mAb IGHV allele frequencies colored by subdomain specificity, shown separately for the three sets of mAbs isolated at the different time points. (c) Pie charts of mAb subdomain frequencies shown separately for the three sets of mAbs isolated at the different time points.

**a**

ADI-67983 subsampled to 500 sequences

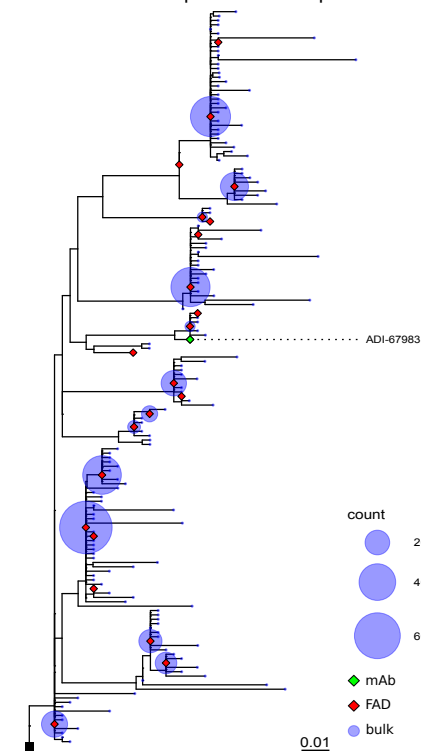**b**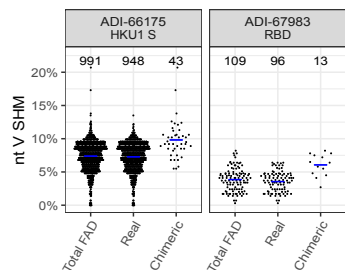**c**

| Donor   | Isotype | Timepoint    | Total reads | Merged reads | FAD   | Chimera cleaning | Clonotypes |
|---------|---------|--------------|-------------|--------------|-------|------------------|------------|
| IML3694 | IgG     | Acute        | 4842232     | 4777889      | 14777 | 13004            | 3391       |
| IML3694 | IgG     | Convalescent | 5701290     | 5586476      | 13252 | 12012            | 4444       |
| IML3694 | IgG     | Post-vax     | 8158571     | 8011800      | 18038 | 17204            | 5627       |
| IML3695 | IgG     | Acute        | 4594108     | 4516270      | 10072 | 9016             | 3027       |
| IML3695 | IgG     | Convalescent | 5620379     | 5562365      | 8096  | 7669             | 2035       |
| IML3695 | IgG     | Post-vax     | 6742232     | 6632439      | 17855 | 17133            | 3855       |
| IML3694 | IgM     | Acute        | 1070302     | 954167       | 14501 | 13948            | 12126      |
| IML3694 | IgM     | Acute        | 652551      | 606189       | 23481 | 23460            | 21495      |
| IML3694 | IgM     | Acute        | 1102412     | 969176       | 16930 | 16678            | 14979      |
| IML3695 | IgM     | Acute        | 921646      | 829652       | 13052 | 12905            | 10974      |
| IML3695 | IgM     | Acute        | 989121      | 927195       | 17956 | 17737            | 14959      |
| IML3695 | IgM     | Acute        | 667778      | 600625       | 21124 | 21102            | 17881      |

**d**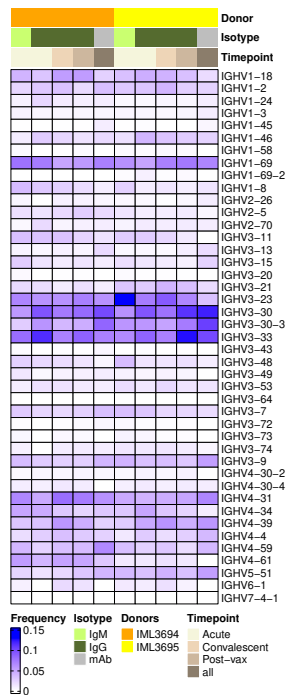**Supplementary Figure 4.** FAD and chimera detection sequence pre-processing and sequencing summary statistics.

(a) Maximum likelihood phylogenetic tree of Rep-Seq and mAb sequences belonging to the same lineage as the ADI-67983 mAb prior to FAD denoising, subsampled to 500 sequences. Sequences that remained after Fast Amplicon Denoising are marked in red. The tree is rooted on an inferred germline sequence obtained from the IgBLAST-generated “germline\_alignment” column of the sequence with the smallest IGHV SHM in the lineage. (b) IGHV SHM nucleotide percentage dot plots for the ADI-66175 and ADI-67983 clones IgG Rep-seq sequences, demonstrating the difference between SHM distributions with and without chimera removal. Blue crossbars are Rep-seq data averages. (c) Sequence count data at each processing step. (d) Heatmap of clonally collapsed IGHV gene frequencies of bulk libraries and mAbs.
