# Supplementary material
Source: PubMed Central journal article supplement (PMC10115778)
Supplement: 41467_2023_37972_MOESM3_ESM.pdf [file 41467_2023_37972_MOESM3_ESM.pdf]

File name: Supplementary Data 1

Description: Figure 1 serum titer donor samples datasheet.

File name: Supplementary Data 2

Description: Monoclonal antibody data sheet including sequence data, subdomain specificities, neutralization titers, *VDJ* gene assignment, and primers used to amplify mAbs.

File name: Supplementary Data 3

Description: IgDiscover inferred genotypes for IML3694 and IML3695 as well as primers used for IgM and IgG Rep-seq library preparation.
